1 **Corticocortical signaling drives activity in a downstream area**  
2 **rapidly and scalably**

3  
4 **Xiaojian Li<sup>1</sup>, Naoki Yamawaki<sup>1</sup>, John M. Barrett<sup>1</sup>, Konrad P. Körding<sup>1,2</sup>, Gordon M. G.**  
5 **Shepherd<sup>1\*</sup>**

6  
7 <sup>1</sup>Department of Physiology, Feinberg School of Medicine, Northwestern University, Chicago,  
8 Illinois, USA;

9 <sup>2</sup>Department of Physical Medicine and Rehabilitation, Feinberg School of Medicine,  
10 Northwestern University, Chicago, Illinois, USA;

11 \*For correspondence: g-shepherd@northwestern.edu

12  
13 **How effectively does activity in an upstream cortical area drive activity in a downstream**  
14 **area? To address this, we combined optogenetic photostimulation with multi-unit**  
15 **electrophysiology to study a parietofrontal corticocortical pathway from retrosplenial**  
16 **cortex to posterior secondary motor cortex in mice. Photostimulation in the upstream area**  
17 **produced local activity that decayed quickly. This activity in turn drove downstream**  
18 **activity that arrived rapidly (5-10 ms latencies), and scaled in amplitude across a wide**  
19 **range of stimulus parameters as an approximately constant fraction (~0.2) of the upstream**  
20 **activity. A model-based analysis could explain the corticocortically driven activity with**  
21 **exponentially decaying kernels (~20 ms time constant) and small delay. Reverse**  
22 **(antidromic) driving was similarly robust. The results show that corticocortical signaling in**  
23 **this pathway drives downstream activity in a mostly linear manner. The regular and**

24 **predictable responses further suggest that precise stimulation driven control of cortical**  
25 **population activity should be possible.**

26

## 27 **INTRODUCTION**

28 Corticocortical pathways support inter-areal communication, which is central to behavior  
29 (Felleman and Van Essen, 1991; Misic and Sporns, 2016). Connectomics studies in both humans  
30 and animal models have identified a structural basis for many corticocortical pathways (Oh et al.,  
31 2014; Zingg et al., 2014; Jbabdi et al., 2015; Glasser et al., 2016; Bassett and Sporns, 2017), and  
32 optogenetic mapping studies in rodents have begun to characterize dynamic signaling at the  
33 mesoscopic scale (Lim et al., 2012). However, the functional properties of inter-areal signaling  
34 in these pathways have been challenging to resolve, particularly for higher-order pathways that  
35 are many synapses removed from the sensory periphery and thus difficult to activate in a  
36 spatiotemporally precise manner with natural stimuli. Extracellular electrical stimulation has  
37 been used in efforts to artificially generate focal activity, but is inherently limited due to its  
38 nonspecificity, antidromic activation, and other issues (Nowak and Bullier, 1998; Histed et al.,  
39 2009). More work is needed to understand the dynamics of corticocortical signaling.

40 Recently developed optogenetic methods promise a more precise approach towards  
41 characterizing corticocortical communication. They have enabled detailed characterization of  
42 cell-type-specific connections in long-range circuits *ex vivo* (Petreanu et al., 2007; Petreanu et  
43 al., 2009). They have enabled the characterization of inter-areal corticocortical circuits in mice at  
44 the cellular level (Mao et al., 2011; Hooks et al., 2013; Yang et al., 2013; Kinnischtzke et al.,  
45 2014; Petrof et al., 2015; Suter and Shepherd, 2015; Kinnischtzke et al., 2016; Sreenivasan et al.,  
46 2016). They have also been used *in vivo* to characterize how optogenetically evoked activity

47 interacts with sensory input at the level of the cortex (e.g. (Manita et al., 2015)). However, they  
48 have not yet been exploited to characterize in detail how optogenetically evoked activity  
49 propagates between cortical areas, particularly for higher-order areas that are deep within the  
50 corticocortical network and therefore inaccessible for discrete activation by sensory stimuli.

51 A newly characterized higher-order corticocortical pathway goes from retrosplenial  
52 cortex (RSC) to posterior secondary motor cortex (M2) (Yamawaki et al., 2016). RSC axons  
53 innervate M2 neurons broadly across all layers and projection classes, forming a synaptic circuit  
54 whereby RSC, which receives input from dorsal hippocampal networks and is involved in spatial  
55 memory and navigation, appears to communicate with M2, which sends output to diverse motor-  
56 related areas and appears to be involved in diverse sensorimotor functions. As such, this  
57 connection is an interesting target for the reverse engineering of corticocortical connections.

58 What kind of dynamic signaling is supported by the cellular connections in this  
59 RSC→M2 pathway? We may expect interactions to be nonlinear; every neuron is nonlinear  
60 through its spiking mechanism, there are many types of connections, and the neurons are  
61 organized into a nonlinear recurrent system. Alternatively, we may expect that the system  
62 actively linearizes itself (Bernander et al., 1994). Characterizing corticocortical interactions is  
63 important as it promises to inform many theories of neural computation (Arbib, 2002;  
64 Ermentrout and Terman, 2010).

65 How strongly might signaling along the RSC→M2 pathway be driven when probed with  
66 photostimulation? It might be very strong; after all, photostimulation may incite many more  
67 neurons to spike than typical stimuli. Alternatively, we may expect it to be weak; after all, M2  
68 receives only a fraction of its inputs from RSC. Indeed, corticocortical signaling may only

69 modulate activity driven by other inputs and have very little impact on its own (Sherman and  
70 Guillery, 2011). These questions again speak to ways of theorizing about neural computation.

71 Here we sought to answer these questions by developing an approach for assessing and  
72 manipulating corticocortical circuit dynamics in the intact brain. We used stereotaxic viral  
73 injections to express ChR2 in presynaptic RSC neurons (Yamawaki et al., 2016), and developed  
74 *in vivo* methods in the anesthetized mouse for sampling photo-evoked multi-unit activity in M2  
75 driven by RSC photostimulation. Duplication of the setup to permit both stimulation and  
76 recording at both ends of the RSC→M2 projection allowed a detailed parametric characterization  
77 of both local (upstream) and downstream activity evoked both ortho- and antidromically. This  
78 allowed us to carefully measure the influence inter-areal signaling as a function of stimulation  
79 amplitude, duration, and the area being stimulated.

80

## 81 **RESULTS**

82 To investigate corticocortical signaling in the RSC→M2 pathway, we used viral methods to label  
83 neurons with ChR2, optical fibers to photostimulate them, and linear arrays to record the evoked  
84 activity. Similar to previous studies of this pathway (Yamawaki et al., 2016), we infected  
85 neurons in RSC with an AAV encoding ChR2 and a fluorescent protein (**Fig. 1A,B**). After a  
86 recovery period of several weeks, animals were anesthetized with ketamine and underwent  
87 placement of photostimulation fibers and silicon probes in the RSC and M2 (**Fig. 1C**).

88

### 89 **RSC photostimulation drives downstream M2 activity**

90 To understand how RSC affects M2 activity, we photostimulated in RSC and measured multi-  
91 unit activity in M2 (**Fig. 2A**). In single trials, activity was typically detected on multiple channels

92 **(Fig. 2B)**. Over repeated trials, on channels showing responses, photostimulation reliably evoked  
93 spiking activity **(Fig. 2C)**. The peristimulus time histogram shows clear stimulus triggered  
94 activity **(Fig. 2D, top)**. These histograms of M2 activity showed robust, transient increases in  
95 activity starting with a short delay after the onset of photostimulation in RSC.

96 It is important to understand how the virus and the construct might affect the responses.  
97 We therefore performed parallel experiments with two different AAV serotypes carrying  
98 different variants of ChR2 driven by different promoters: AAV1-ChR2-Venus, carrying wild-  
99 type ChR2 driven by the CAG promoter, and AAV9-ChR2-eYFP, carrying ChR2 with the  
100 H134R mutation driven by the CaMKII promoter (see Methods). The two viruses gave similar  
101 responses **(Fig. 2D)**, an impression that was borne out in further detailed comparisons that will  
102 be presented in later sections. Our findings suggest that our strategy is not overly affected by  
103 details of the virus or construct.

104 We need to be sure that the M2 responses reflect synaptically driven spikes of  
105 postsynaptic M2 neurons, rather than spikes in presynaptic axons. We therefore sampled M2  
106 responses before and after injecting M2 with muscimol, a GABA agonist, which suppresses  
107 spiking in cortical neurons while preserving presynaptic spiking (Chapman et al., 1991;  
108 Chatterjee and Callaway, 2003). As expected, muscimol injection abolished most of the activity  
109 in M2 (3 of 3 animals) **(Fig. 2E, top)**, whereas injection of saline had no effect (2 of 2 animals).  
110 Thus, M2 responses are, indeed, driven by corticocortical synaptic activity.

111 We also want to be sure that our results cannot be overly affected by probe placement. In  
112 earlier pilot experiments the probe was sometimes inadvertently placed slightly lateral by ~0.5-1  
113 mm, resulting in recordings in M1 instead of M2. In this case we observed little or no photo-  
114 evoked activity **(Fig. 2E, bottom)**, consistent with the anatomy and electroanatomy of the

115 RSC→M2 projection, which provides little or no direct input to M1 neurons (Yamawaki et al.,  
116 2016). Mistaken probe placement would thus simply decrease the observed activity.

117 From the results of these initial characterizations we conclude that (i) optogenetically  
118 stimulating RSC drives a delayed, brief wave of spiking activity in M2; (ii) the evoked activity  
119 appears to reflect mostly the properties of the corticocortical circuit itself rather than the those of  
120 the viruses and/or constructs; and (iii) the M2 activity appears to arise from orthodromically  
121 driven signaling along the RSC→M2 corticocortical pathway, rather than non-specific (e.g.  
122 cortex-wide) activation. Next, we turned to a more in-depth characterization of the technique by  
123 recording in both areas.

124

### 125 **Comparison of local RSC and downstream M2 activity evoked by RSC photostimulation**

126 To better understand signaling in the RSC→M2 circuit, we recorded from both the RSC and M2  
127 during RSC photostimulation, allowing us to assess both the locally driven activity in upstream  
128 RSC and the orthodromically driven activity in downstream M2 (**Fig. 3A**). As observed with  
129 both AAV9-ChR2 (**Fig. 3B-F**) and AAV1-ChR2 (**Fig. 3G-K**), with RSC photostimulation the  
130 activity recorded in RSC rose rapidly at the onset of photostimulation and declined rapidly as  
131 well, whereas activity recorded in M2 followed with a brief latency (in ms after the RSC peak:  
132 7.5 for AAV9, and 6.5 for AAV1) and rose to lower levels than observed in RSC (RSC/M2  
133 amplitude ratio: 3.8 for AAV9, 4.1 for AAV1). The results of this two-probe characterization of  
134 RSC photostimulation thus reveal two important aspects of corticocortical driving. First, at the  
135 upstream end there is a rapid and strong decay of the local activity in the directly  
136 photostimulated RSC (**Fig. 3B,G**). This decay is generally consistent with ChR2 desensitization  
137 (Lin et al., 2009), and the greater decay observed with AAV1 is consistent with the reduced

138 desensitization of ChR2-H134R mutation (in AAV9) compared to wild-type ChR2 (in AAV1)  
139 (Nagel et al., 2003; Nagel et al., 2005). Second, at the downstream end the corticocortically  
140 driven activity in M2 was reduced in amplitude and slightly delayed relative to the RSC activity.  
141 A caveat is that these properties might not be generalizable, reflecting instead the particular  
142 photostimulus parameters used in these experiments. Therefore, we next investigated in detail the  
143 stimulus dependence of the responses by exploring a wide range of stimulus intensities and  
144 durations.

145

#### 146 **Parametric characterization of orthodromic (forward) driving**

147 Key parameters for the dynamics of a circuit are the dependency on stimulus amplitude (light  
148 intensity) and duration (pulse width). Stimulus trials were delivered at five different intensities  
149 (20, 40, 60, 80, and 100% relative to maximum) and durations (1, 5, 10, 20, and 50 ms), with  
150 random interleaving and many repetitions (typically 30 trials per experiment) for each of the 25  
151 unique intensity-duration combinations (**Fig. 4A**). Responses on the local RSC probe and the  
152 downstream M2 probe were averaged across trials as before, and the median responses were  
153 determined across animals (AAV9 data shown in **Fig. 4B,C**; AAV1 data shown in **Fig. 4-figure**  
154 **supplement 1**). Clearly, the evoked activity in both RSC and M2 varied with stimulus  
155 parameters. To assess how response properties might depend systematically on stimulus  
156 parameters, we developed a simple model, and performed several further analyses.

157

#### 158 **A simple two-stage model captures the major features of orthodromic driving**

159 To better understand the responses we want to fit a simple model to the data. Visual inspection of  
160 the waveforms of both the RSC and M2 responses (**Fig. 4**) shows roughly linear increases with

161 intensity. Clearly, activity in the photostimulated RSC decays rapidly and extensively, consistent  
162 with ChR2 desensitization (as discussed above). However, in the downstream M2, it is unclear  
163 how responses scale directly with upstream RSC activity; for example, do they scale linearly, or  
164 show signs of adaptation? We would like a simple model to allow us to both describe and  
165 interpret the data.

166 Explorative data analysis revealed that we could fit the directly stimulated (upstream)  
167 area well with briefly delayed activation followed by a large and rapid decay (**Fig. 5A**). Hence,  
168 we modeled stimulation as a time-shifted delta function divided by a linear function of the  
169 integral of the stimulus history. So this first-stage model has 3 parameters for gain, delay, and the  
170 steady state adaptation. These parameters seem intuitively necessary: the gain describes basic  
171 physiology; the delay is needed due to the ~3 ms blanking of the stimulus artifact (see Methods),  
172 but can also account for ChR2 activation kinetics; adaptation is expected from ChR2  
173 inactivation/desensitization kinetics, and allows for additional factors contributing to a temporal  
174 decline in activity (e.g. GABA release, synaptic depression).

175 Indeed, we found this model to produce good fits when we analyzed activity in the  
176 stimulated (RSC) area. We find that the model qualitatively describes the data, describing both  
177 its initial rise, and its decay over time (AAV9 data shown in **Fig. 5B,C**; AAV1 data shown in  
178 **Fig. 5—figure supplement 1A,B**). In fact, it has high  $R^2$  values on both the AAV9 (0.93) and the  
179 AAV1 (0.83) datasets. This suggests that the bulk of the stimulation effect is described by an  
180 essentially immediate stimulus followed by considerable decay.

181 Explorative data analysis revealed that we could fit the indirectly stimulated  
182 (downstream) area well with thresholded activation without decay, or adaptation (**Fig. 5A**) in  
183 terms of the activity of the stimulated area. We modeled this as an exponentially decaying kernel



184 with temporal integration and a threshold. So this second-stage model has 4 parameters for gain,  
185 threshold, kernel time-constant, and baseline. These 4 parameters again seem intuitively  
186 necessary: the gain describes basic physiology; sufficiently weak stimulation produces little  
187 activity; there is a slow transmission of information; and, there is non-zero baseline activity in  
188 the downstream area. Adding an explicit delay parameter to the model was not necessary: the  
189 combination of thresholding and slow stimulus integration sufficed to reproduce the  
190 experimentally observed the delay.

191 We found this model to produce good fits in the downstream (M2) area. We find that the  
192 model qualitatively describes the data, describing both its slow rise, and its subsequent decay  
193 over time (AAV9 data shown in **Fig. 5D,E**; AAV1 data shown in **Fig. 5—figure supplement**  
194 **1C,D**). It also describes how in some conditions there is no activation whatsoever. This model  
195 also has high  $R^2$  values on both the AAV9 (0.70) and the AAV1 (0.65) datasets. The time  
196 constants of the fitted exponential kernels were on the order of a few tens of milliseconds (20 ms  
197 for AAV9 and 32 ms for AAV1 data), which combines many aspects, including synaptic current,  
198 membrane constants, and is also comparable to the time constants of fast spike adaptation in  
199 cortical excitatory neurons (La Camera et al., 2006; Wark et al., 2007; Suter et al., 2013). This  
200 suggests that the bulk of the stimulation effect is described by an arrival of stimulation which  
201 decays exponentially over time.

202

### 203 **Analysis of orthodromically driven responses**

204 Next, we assessed whether the reduced amplitude of M2 responses (compared to upstream RSC  
205 activity, discussed above) was a consistent property across stimulus parameters. Plotting the  
206 response amplitudes in RSC and M2 for all 25 stimulus combinations (**Fig. 6A**) showed that

207 these ranged widely but with a consistent relationship, substantially greater in RSC than in M2.  
208 The same pattern was observed for both viruses (factor of 4.7 for AAV9 and 6.8 for AAV1  
209 experiments), even though absolute response amplitudes were generally stronger for AAV9  
210 compared to AAV1 (1.5-fold for RSC responses and 2.1-fold for M2 responses;  $p < 10^{-3}$ , sign  
211 test). Overall, the ‘driving ratio’, the ratio of the remotely driven activity in M2 relative to the  
212 locally driven activity in RSC, was  $\sim 0.2$  (**Fig. 6B**). In other words, activity in the downstream  
213 area, M2, was generally about a fifth of that in RSC, across a wide range of stimulus parameters.

214 Of further importance to the interaction are latencies. These also showed a consistent  
215 relationship, with M2 responses peaking with a short delay after RSC responses (**Fig. 6C**). The  
216 same pattern was observed for both viruses (median latency of M2 response relative to RSC  
217 response of 8 ms for AAV9 and 7 ms for AAV1 experiments). In this case, unlike the absolute  
218 response amplitudes, the latencies of the responses in RSC and M2 did not differ significantly for  
219 AAV9 vs AAV1 ( $p > 0.05$ , sign test). In contrast to the amplitudes, the latencies were largely  
220 stimulus-independent.

221 Response amplitudes in both areas clearly varied systematically and substantially for  
222 different combinations of stimulus intensity and duration (**Fig. 4B,C; Fig. 6A**), but how?  
223 Plotting the RSC responses as a function of stimulus intensity showed a linear dependence (**Fig.**  
224 **6–figure supplement 1A,B**). In contrast, plotting the same RSC responses as a function of  
225 stimulus duration showed a sub-linear dependence (**Fig. 6–figure supplement 1C,D**). Applying  
226 the same analysis to the modeled traces gave qualitatively similar results (**Fig. 6–figure**  
227 **supplement 1**, bottom row of plots).

228 The M2 responses showed a similar, albeit noisier, set of patterns, with roughly linear  
229 intensity-dependence (**Fig. 6–figure supplement 2A,B**) and sub-linear duration-dependence

230 **(Fig. 6–figure supplement 2C,D)**. Applying the same analysis to the modeled traces again gave  
231 qualitatively similar results (**Fig. 6–figure supplement 2**, bottom row of plots). Results with  
232 AAV1-ChR2 showed similar patterns (data not shown).

233

### 234 **Driving in reverse: antidromic propagation**

235 The photoexcitability of ChR2-expressing axons (Petreanu et al., 2007) has previously been  
236 exploited in *in vivo* experiments to antidromically drive a trans-callosal corticocortical projection  
237 (Sato et al., 2014). Here, our experimental set-up (**Fig. 2**) allowed us to similarly drive the  
238 RSC→M2 projection in reverse, as a way to gain additional insight into signaling properties in  
239 this system. Characterization of antidromic optogenetic driving is additionally of technical  
240 interest both as an intended (e.g. (Sato et al., 2014)) or unintended effect of focal  
241 photostimulation in an area containing ChR2-expressing axons. Using the same labeling strategy  
242 (i.e., AAV-ChR2 in RSC) and recording (i.e., electrodes in both RSC and M2) arrangement, in  
243 the same experiments we also delivered photostimuli to M2 (via a second optical fiber) as a way  
244 to activate ChR2-expressing axons there (i.e., projecting from RSC) and thereby gain insight into  
245 the properties of antidromic signaling in the same RSC→M2 pathways (**Fig. 7A**).

246 In particular, we wondered if antidromic activation would result in similar or different  
247 effects compared to orthodromic activation. Photostimulation in M2 resulted in a short-latency,  
248 short-duration wave of antidromically generated activity in both RSC and a similar but smaller-  
249 amplitude wave of locally generated activity in M2. Similar results were found for experiments  
250 with AAV9 (**Fig. 7B-F**) and AAV1 (**Fig. 7G-K**). Neither amplitudes nor latencies differed with  
251 antidromic activation for the 10-ms, 100% stimulus combination. However, across all stimulus  
252 combinations the response amplitudes were overall ~2-fold greater in RSC relative to M2 (**Fig.**

253 **7L**), contrasting with the reduced amplitude in the downstream area observed with orthodromic  
254 stimulation. Similar to orthodromic stimulation, absolute response amplitudes were generally  
255 stronger for AAV9 compared to AAV1 (2.6-fold for RSC responses and 3.8-fold for M2  
256 responses;  $p < 10^{-3}$ , sign test). Latencies in the two areas were indistinguishable with AAV1 and  
257 slightly delayed (by 3 ms) in M2 with AAV9 (**Fig. 7M**). Latencies in RSC were slightly shorter  
258 with AAV9 than AAV1 (by 2.5 ms;  $p < 10^{-4}$ , sign test), but those in M2 were the same with the  
259 two viruses ( $p > 0.05$ , sign test). These results indicate that RSC axons forming this  
260 corticocortical projection can be robustly activated in M2, generating activity both locally in M2  
261 and antidromically in RSC – which is in effect the ‘downstream’ area in this experimental  
262 configuration.

263

#### 264 **Laminar analysis**

265 Lastly, we considered the laminar profile of M2 activity generated by activation of the  
266 RSC→M2 pathway. As in the previous experiments involving orthodromic activation, we  
267 injected virus into the RSC, and subsequently inserted the silicon probe (32 channels and 50  $\mu\text{m}$   
268 spacing) to record downstream activity in M2. The probe was inserted leaving several contacts  
269 out of the cortex; the depth of penetration was estimated both by viewing the site of entry with a  
270 high-power stereoscope, and by assessing channel noise variance, which was low for contacts  
271 outside cortex (see Methods) (**Fig. 8A,B**). Group analysis ( $n = 9$  mice injected with AAV1-  
272 ChR2) of activity across channels indicated a bias towards deeper layers (**Fig. 8C,D**). Previous  
273 slice-based characterization of RSC→M2 connectivity indicated that RSC axons form  
274 monosynaptic excitatory synapses onto postsynaptic M2 neurons across all layers and major  
275 classes of projection neurons, including upper-layer neurons (Yamawaki et al., 2016). Because

276 those experiments were performed in whole-cell voltage-clamp mode, here, to explore the  
277 cellular basis for the preferential activation of deeper layers in M2 we performed similar brain  
278 slice experiments but with cell-attached current-clamp recordings, allowing assessment of the  
279 efficacy of RSC inputs in generating suprathreshold (spiking) activity in M2 neurons.  
280 Comparison of layer 2/3 and layer 5 neurons showed significantly greater tendency of photo-  
281 activated RSC axons to generate spikes in layer 5 neurons (**Fig. 8E**), consistent with the laminar  
282 profile recorded *in vivo* (**Fig. 8C,D**). The laminar distribution of activities thus indicates that  
283 RSC drives M2 neurons across multiple layers, particularly the middle and deeper layers.  
284 Because these layers contain projection neurons with diverse outputs to the pons, midbrain,  
285 thalamus, and more, this result reinforces the idea that RSC→M2 corticocortical signaling can  
286 serve as a robust conduit for information along this parietofrontal pathway.

287

## 288 **DISCUSSION**

289 We analyzed corticocortical signaling in the RSC→M2 pathway *in vivo* using optogenetic  
290 photostimulation and electrophysiology. Across a wide range of stimulus parameters, the  
291 downstream responses arrived rapidly and scaled systematically with the photo-evoked activity  
292 in the upstream area. We found that a simple model involving linear integration, delay, and  
293 thresholding could describe much of the data.

294 In using optogenetic photostimulation to analyze this circuit we did not attempt to mimic  
295 naturalistic activity patterns of the RSC but rather used this as a tool to perturb the circuit  
296 (Miesenbock, 2009). This approach allowed us to systematically vary the stimulus intensity and  
297 duration and assess whether and how response properties depended on input parameters. Another  
298 artificial aspect of these experiments was the use of anesthesia, without which extensive

299 parametric testing would have been challenging with head-fixed animals. Our approach is aimed  
300 at understanding computational aspects of corticocortical population signaling, rather than how  
301 detailed corticocortical signals relate to the high-dimensional aspects of behavior (Carandini,  
302 2012).

303         We found that a simple two-stage model captured the broad features of the data. At the  
304 upstream end, the conversion of light energy into local spiking activity in the upstream area (the  
305 RSC) could be described as a simple transfer function dominated by strong and rapid decay. The  
306 decay likely reflects primarily ChR2 desensitization, a property common to all ChR2 variants  
307 including the two used here (Nagel et al., 2003; Nagel et al., 2005; Lin et al., 2009). Additional  
308 components of the decay may have come from endogenous factors associated with the neurons  
309 and microcircuits in the locally stimulated area (e.g. GABA release from inhibitory interneurons,  
310 short-term synaptic depression). One potential application of this first-stage model of the local  
311 photoactivation process is that it could be used to design photostimuli that precisely compensate  
312 for the decay.

313         At the downstream end, the conversion of upstream activity (in RSC) into downstream  
314 activity (in M2) could be described by a simple exponential process with a brief delay, and no  
315 adaptation mechanism. Although a small non-linearity was included in the form of a threshold,  
316 the efficacy of the model suggests that corticocortical signaling is mostly linear. The efficacy of  
317 the second-stage model implies that corticocortical driving of downstream activity is highly  
318 scalable. It also implies that adaptation is not a major factor in shaping the downstream response,  
319 at least on the short time scales (tens of milliseconds) studied here. However, some contribution  
320 of an adaptation process may be reflected in the early component of the responses, which tend to  
321 be larger than the fitted traces. Whether this simple model can describe corticocortical signaling

322 in other inter-areal pathways remains to be determined, but similarities between our findings  
323 using optogenetic activation and related work in the visual system (e.g. (Carandini et al., 1997))  
324 suggest this is plausible.

325 The scalability of corticocortical signaling observed here may be particular to the  
326 RSC→M2 pathway, or may represent a more general computational principle of cortical  
327 operation (Miller, 2016; Rolls, 2016). Although cortical circuit organization appears basically  
328 conserved, areas can also differ substantially in their quantitative properties (Harris and  
329 Shepherd, 2015). Corticocortical signaling in other pathways might therefore be expected to  
330 exhibit broadly similar scalability, but with pathway-specific differences in the details of  
331 spatiotemporal dynamics. The ability to capture both general and pathway-specific features of  
332 corticocortical signaling in a simple mathematical model suggest a utility of this approach both  
333 for theoretical approaches to cortical network modeling (Bassett and Sporns, 2017) and for  
334 neural engineering approaches in which closed-loop neural dynamics and behavioral control  
335 require predictive modeling (Grosenick et al., 2015). Further studies will be needed to test these  
336 speculations.

337 The downstream response latencies (~8 ms after upstream responses), together with the  
338 RSC-M2 inter-areal distance of ~2 mm and allowing for the timing of synaptic transmission  
339 (Sabatini and Regehr, 1999), implies a conduction speed for these RSC→M2 corticocortical  
340 axons on the order of 0.3 m/s, a typical value for thin unmyelinated cortical axons (Raastad and  
341 Shepherd, 2003). The consistency of the latency across different stimulus parameters suggests  
342 that the RSC→M2 circuit was activated in a similar manner independent of the particular activity  
343 level of the RSC neurons; in particular, this suggests that the M2 activity resulted from direct  
344 excitatory RSC input to M2 neurons, rather than polysynaptic pathways via posterior parietal

345 cortex or anterior thalamus (Yamawaki et al., 2016) or hippocampus (Sugar et al., 2011). Had  
346 polysynaptic interactions been increasingly engaged by longer-duration stimuli, responses should  
347 have increased over time in both RSC and M2, not decreased as observed.

348 In addition to robust forward (orthodromic) activation, we found robust reverse  
349 (antidromic) corticocortical signaling in RSC→M2 circuits. Antidromic driving, evoked by  
350 stimulating in M2 the ChR2-labeled axons projecting from RSC, was notable for two distinct  
351 properties. First, photostimulation in M2 (or ChR2-expressing axons of RSC neurons) generated  
352 even more activity downstream in RSC than locally in M2, by a factor of ~2. Thus, the gain in  
353 this corticocortical circuit (ratio of downstream to upstream activity) appeared to be a property  
354 associated with the anatomical directionality of the projection (RSC→M2), rather than  
355 determined by the site of stimulation. The greater activity in RSC could reflect locally abundant  
356 axonal branches of the labeled RSC neurons. Second, the efficiency of information transmission  
357 appeared similar in either direction; i.e., a property associated with the site of stimulation rather  
358 than the anatomical directionality of the projection. Optogenetic antidromic activation has been  
359 previously exploited used as a way to selectively generate activity in an area (e.g. (Sato et al.,  
360 2014)). Our results thus not only provide an additional example of how a corticocortical pathway  
361 can be driven in reverse to remotely generate activity in an area of interest, but identify key  
362 similarities as well as differences compared to orthodromic driving.

363 Corticocortical signaling in the RSC→M2 pathway may be critical for conveying  
364 information from hippocampus-associated networks involved in spatial memory and navigation  
365 to cortical and subcortical networks involved in decision making and action planning and  
366 execution (Vann et al., 2009; Sugar et al., 2011; Yamawaki et al., 2016). Consistent with this,  
367 lesions of the RSC impair navigation without impairing either motor function or the ability to



368 recognize navigational landmarks (Maguire, 2001), and RSC pathology can be an early and  
369 prominent feature of Alzheimer's disease (Minoshima et al., 1997). Conversely, the RSC→M2  
370 connectivity appears strengthened after damage to adjacent cortex in a mouse stroke model  
371 (Brown et al., 2009). Thus another potential application of experimental-theoretical paradigm  
372 developed here is to understand primary pathology and adaptive plasticity in corticocortical  
373 signaling in mouse models of disease.

374

375

## 376 **MATERIALS AND METHODS**

377

378 Animals. Studies were approved by the Northwestern University Animal Care and Use  
379 Committee, and followed the animal welfare guidelines of the Society for Neuroscience and  
380 National Institutes of Health. Wild-type mice (C57BL/6, female and male; Jackson Laboratory,  
381 Bar Harbor, ME) were bred in-house. Mice were 6-9 weeks old at the time of *in vivo*  
382 experiments.

383

384 Stereotaxic injections. Mice under deep anesthesia underwent stereotaxic injection of adeno-  
385 associated virus (AAV) carrying ChR2 into the RSC, following standard methods as previously  
386 described (Yamawaki and Shepherd, 2015; Yamawaki et al., 2016). Two viruses were used:  
387 AAV1.CAG.ChR2-Venus.WPRE.SV40 (AV-1-20071P, University of Pennsylvania Vector  
388 Core, Philadelphia, PA; Addgene #20071, Addgene, Cambridge, MA), and  
389 AAV9.CamKIIa.hChR2(H134R)-eYFP.WPRE.hGH (AV-9-26969P, Penn Vector Core;  
390 Addgene #26969P). Stereotaxic coordinates for the RSC were: -1.4 mm caudal to bregma, ~0.5

391 mm lateral to midline. To minimize cortical damage, the glass injection pipette was pulled to a  
392 fine tip, beveled to a sharp edge (Micro Grinder EG-400, Narishige, Tokyo, Japan), and  
393 advanced slowly into the cortex; injections were made slowly (over 3 minutes) at two depths (0.8  
394 and 1.2 mm from pia, ~20 nL per injection). Mice were returned their home cages and  
395 subsequently maintained for at least 3 weeks prior to experiments, to allow time for ChR2  
396 expression levels to rise in the infected neurons.

397

398 Cranial hardware. Mice under deep anesthesia underwent placement of cranial mounting  
399 hardware. A small skin incision was made over the cerebellum to expose the skull, and a  
400 stainless-steel set screw (single-ended #8-32, SS8S050, Thorlabs, Newton, NJ), crimped with a  
401 spade terminal (non-insulated, 69145K438, McMaster-Carr, Elmhurst, IL) was affixed with  
402 dental cement to the skull. This set screw was later screwed into the tapped hole located at the  
403 top of a 1/2" optical post used for head fixation.

404

405 In vivo circuit analysis: general procedures. Mice were anesthetized with ketamine-xylazine  
406 (ketamine 80-100 mg/kg and xylazine 5-15 mg/kg, injected intraperitoneally), placed in the  
407 recording apparatus, and head-fixed using the set screw as described above. Body temperature  
408 was monitored with a rectal probe and maintained at ~37.0 °C via feedback-controlled heating  
409 pad (FHC, Bowdoin, ME). Craniotomies were opened over the RSC and M2 using a dental drill,  
410 just large enough (~1 mm) to allow passage of the linear arrays and the tips of the optical fibers.  
411 During the subsequent recordings, ACSF was frequently applied to the exposed brain area to  
412 prevent damage from dehydration. The level of anesthesia was continuously monitored based on

413 paw pinching, whisker movement, and eye-blinking reflex. Additional doses of anesthesia were  
414 given (50% of induction dose) when required.

415

416 Photostimulation apparatus. An optical fiber (FG400AEA, multimode fiber, 0.22 NA, 400  $\mu\text{m}$   
417 core, outer diameter 550  $\mu\text{m}$  with coating; Thorlabs), mounted on a motorized micromanipulator  
418 (Sutter Instrument, Novato, CA), was positioned directly over the region of the infected neurons  
419 in the RSC (**Fig. 2A**). The tip of the fiber was  $\sim 0.5$  mm away from the surface of the brain,  
420 immersed in ACSF. In most experiments, a second fiber was similarly positioned directly over  
421 the M2 (**Fig. 2A**). For each fiber, the light source was an LED (M470L3; Thorlabs), coupled to  
422 the fiber by an adapter (SM1SMA; Thorlabs). The power was controlled using a commercial  
423 (LEDD1B; Thorlabs) or LED driver (based on RCD-24-1.00 module; RECOM Lighting, Neu-  
424 Isenburg, Germany). The output power of the LED driver was modulated by signal waveforms  
425 delivered via a commercial multifunction (analog and digital) interface board (NI USB 6229;  
426 National Instruments, Austin, TX) or by a signal generator based on a 32-bit microcontroller  
427 board (Arduino Due with ARM Cortex-M3, Adafruit, New York, NY). The boards were also  
428 used to send a short pulse train to digitally encode the start and other parameters of the light  
429 waveform, sampled on the digital input port of the electrophysiology data acquisition (DAQ)  
430 board (see **Fig. 2B**). Software tools (LabVIEW) included a GUI (GenWave) for generating and  
431 transferring the waveforms to the LED controller. The LED driver was either internally software-  
432 triggered (GenWave) or externally hardware-triggered by a digital signal. The system was  
433 calibrated using a power meter to determine the relationship between input voltage to the driver  
434 and the output intensity of the fiber, to determine the voltages (in the range of 0–5 V)  
435 corresponding to 0, 20, 40, 60, 80, and 100% of the full power (6.1 mW, measured at the tip of

436 the optical fiber). During the experiment, analog voltages corresponding to these intensities were  
437 sent to the LED driver.

438

439 Electrophysiology apparatus. The linear arrays used were 32-channel silicon probes with ~1 M $\Omega$   
440 impedance and 50- $\mu$ m spacing (model A1 $\times$ 32-6mm-50-177, NeuroNexus, Ann Arbor, MI), in  
441 either “triangular” or “edge” configuration. The probes were mounted on a motorized 4-axis  
442 micromanipulator (Thorlabs MTSA1 linear translator mounted on a Sutter MP285 3-axis  
443 manipulator), and positioned under stereoscopic visualization over the M2 at cortical surface  
444 (i.e., entry point) coordinates of +0.6 mm rostral to bregma and 0.2 mm lateral to midline. The  
445 probes were tilted by ~30° off the vertical axis for alignment with the radial axis of the cortex.  
446 The probe was then slowly inserted into the cortex at a rate of 2  $\mu$ m/s (controlled by software),  
447 until it reached a depth of 1600  $\mu$ m from the pia. In most experiments, a second array was  
448 similarly inserted into the RSC (same stereotaxic coordinates as given above for the viral  
449 injections), except that in this case the array was inserted perpendicular to the horizontal plane,  
450 and the fiber was slightly tilted (**Fig. 2A**).

451 Signals were amplified using a RHD2132 amplifier board based on a RHD2132 digital  
452 electrophysiology interface chip (Intan Technologies, Los Angeles, CA). The RHD2132 chip is  
453 an AFE (analog front end) which integrates the analog instrument amplifiers, filters, analog-to-  
454 digital converters, and microcontrollers in one chip. The SPI (serial peripheral interface) port is  
455 used to configure the chip and to stream the bio-signal data to the DAQ board. The gain of the  
456 amplifier was fixed at  $96 \times 2 = 192$  (2-stage amplifier). The filter was set to an analog bandpass  
457 of 0.1~ 7.5K Hz with a digital filter cutoff of 1Hz. Because the 32 channels of the bio-signal

458 inputs share the same 16 bit ADC with a multiplexer, and the maximum sample rate of the ADC  
459 is 1.05M SPS, the single channel sample rate was set to 30K SPS.

460 For hardware control, we used a RHD2000 USB Interface Evaluation Board (Intan) or  
461 DAQ board based on a breakout board with a XEM6010 USB/FPGA module (Opal Kelly,  
462 Portland, OR), a field-programmable gate array (FPGA) with many digital I/O channels for  
463 communicating with other digital devices and streaming in all the bio-signal data from the  
464 RHD2000 amplifiers. The USB port of the module was linked with a USB cable to pipe the data  
465 stream in or out the PC. The RHD2000 amplifier boards were connected to a DAQ board using  
466 SPI interface cables in low-voltage differential signal mode, which is well suited for  
467 communication via longer cables. In this experiment, the digital ports included in the DAQ board  
468 were only used for acquiring the LED photostimulation parameters from the LED controller (see  
469 **Fig. 2B**).

470 For data logging, The C++/Qt based experimental interface evaluation software (Intan)  
471 was used for early stage evaluation. Then the original APIs (Rhythm USB/FPGA interface) were  
472 all rebuilt and wrapped up into a LabVIEW-based SDK. All the software, including the amplifier  
473 configuration, online visualization, data logging, and more, were developed from this SDK in  
474 LabVIEW environment.

475  
476 Trace analysis. Data were stored as the raw signal from the amplifiers, filtered by 60 Hz notch  
477 filter. A strong photovoltaic effect contaminated the recordings on the photostimulated probe. To  
478 reduce this, we used the following approach using LabVIEW (National Instruments) routines.  
479 First, we used a digital high-pass filter (800 Hz cut-off, 2<sup>nd</sup>-order Butterworth), which shrank the  
480 photovoltaic artifact to the first 3 ms post-stimulus window. Then, a threshold detector

481 (Threshold Detector VI) was applied, with threshold set to 4 s.d. over a minimum of 3  
482 continuous samples to detect spike peaks. Last, the spike count of the first 3 ms window was  
483 replaced by the average value of the pre-stimulus window of 20 ms. To generate peristimulus  
484 time histograms, we used the following approach using Matlab (Mathworks, Natick, MA)  
485 routines. Time stamps were determined for each detected spike. The time stamps of all the spikes  
486 of every channel were used to generate the peristimulus time histogram and raster maps.  
487 Responses were averaged across all channels in each trial, and then across multiple trials  
488 (typically ~40) to yield a mean histogram.

489

490 Laminar analysis. We estimated the depth of probe insertion in the cortex (and thus the cortical  
491 depth of each contact) based on the total displacement of the motorized manipulator holding the  
492 probe. In addition, because this estimate can be affected by the viscoelastic properties of brain  
493 tissue, we also routinely analyzed the electrophysiological traces to estimate the depth of  
494 insertion. For this, we calculated variance in the FFT of the voltage traces to identify the  
495 transition from low-variance exterior channels and high-variance intracortical channels. The  
496 estimated depth based on this approach matched well with the estimated depth based on images  
497 of the electrode at the site of penetration into the brain. Using this combination of approaches,  
498 the estimated probe depths were thus likely to be accurate within 50-100  $\mu\text{m}$ . Additionally, in a  
499 subset of experiments, probe tracks were labeled by coating the probe with fluorescent dye, and  
500 visualized in subsequently prepared brain slices with epifluorescence optics to verify accurate  
501 placement of the probes in the M2 and/or RSC.

502

503 Model based analysis. We fit the following model to the locally evoked activity in RSC:

$$A_{RSC}(t - u) = ms(t) / \left| a_0 + \sum_{\Delta t}^T s(t - \Delta t) \right|$$

504 where  $m$  is a scaling factor,  $\mathcal{J}(x)=0$  for  $x<0$  and  $\mathcal{J}(x)=x$  for  $x \geq 0$ ,  $a_0$  regulates the strength of  
505 decay,  $\Delta t$  indexes the delays over which stimulation affects activity ( $\Delta t = 0$  would be  
506 instantaneous activation),  $s(t)$  is the optical stimulus and  $u$  is the delay. The three parameters of  
507 this model  $u$ ,  $m$ , and  $a_0$  are optimized to minimize the root mean squared error (RMSE) of the  
508 model using the MATLAB `fminsearch` function.

509 We fit the following model to the downstream activity in M2:

$$A_{M2}(t) = \vartheta \left( m \sum_{\Delta t=1}^T e^{-\frac{\Delta t}{t_{interact}}} A_{RSC}(t - \Delta t) - \theta \right) + c$$

510 where  $m$  is a scaling factor,  $\mathcal{J}(x)=0$  for  $x<0$  and  $\mathcal{J}(x)=x$  for  $x \geq 0$ ,  $\Delta t$  indexes the past input  
511 from RSC,  $t_{interact}$  is the interaction time constant,  $A_{RSC}(t)$  is the activity in area RSC,  $\vartheta$  is the  
512 threshold, and  $c$  is the baseline. The four parameters of this model  $c$ ,  $\vartheta$ ,  $t_{interact}$ , and  $m$  are also  
513 optimized to minimize the RMSE.

514

515 Statistical analyses. Group data were compared using appropriate non-parametric tests (e.g. rank  
516 sum tests for unpaired and sign tests for paired data) as indicated, with significance defined as  $p$   
517  $< 0.05$ . Plots with error bars represent the sample medians  $\pm$  median absolute deviations (m.a.d.)  
518 (calculated with the Matlab function, `mad.m`).

519

520 **ACKNOWLEDGEMENTS:** We thank C. Maguire for technical assistance. We thank David  
521 Heeger and Mike Landy for useful discussions. Grant support: NIH (NINDS grant NS061963;  
522 NIBIB grant EB017695).

523

524 **FIGURES**

525

526 **Figure 1. Viral labeling and instrumentation to study inter-areal signaling in the**  
527 **corticocortical projection from retrosplenial (RSC) to posterior secondary motor (M2)**  
528 **cortex.**

529 (A) Virus injection in RSC infects somata at the injection site, resulting in anterograde labeling  
530 of RSC axons projecting to M2. Right: epifluorescence image of the dorsal surface of the brain  
531 of an anesthetized mouse, showing labeled axons projecting from RSC to posterior M2.

532 (B) Coronal brain slices showing labeled axons in M2, and the track of a dye-coated linear array.  
533 Left: bright-field image. M2 is between the primary motor (M1) and anterior cingulate (AC)  
534 cortices. Right: epifluorescence image, showing labeled axons from RSC within M2, and the  
535 track of a dye-coated linear array (probe) that had been inserted in M2.

536 (C) Depiction of experimental set-up showing aspects of the hardware control apparatus and  
537 wiring. An optical fiber (blue) was placed over, and a silicon probe was inserted into, each of the  
538 two cortical areas. The optical fibers were coupled to blue light-emitting diodes (LEDs). See  
539 Methods for additional details.

540

541 **Figure 2. RSC photostimulation drives downstream M2 activity.**

542 (A) Experimental paradigm: RSC neurons were infected with AAV to express ChR2, and  
543 photostimuli were applied to RSC while recording multi-unit activity in M2, to sample  
544 orthodromically generated activity in the downstream area.



545 (B) Example traces across channels for a single trial of photostimulation (10-ms duration, 100%  
546 intensity; marked by blue band).  
547 (C) Example traces from one recording channel (black trace in panel D) over multiple trials.  
548 Photostimulation reliably generated post-stimulus spiking activity.  
549 (D) Peristimulus time histogram showing the mean photo-evoked response across all channels  
550 and trials. Top: Example from an animal injected with AAV9-ChR2. Bottom: Example from an  
551 animal injected with AAV1-ChR2.  
552 (E) Top: Injection of muscimol into the M2 cortex abolished most of the evoked activity.  
553 Bottom: Little activity was detected when the probe was placed in a laterally adjacent cortical  
554 area (primary motor cortex, M1).

555

556 **Figure 3. Comparison of local RSC and downstream M2 activity evoked by RSC**  
557 **photostimulation.**

558 (A) Experimental paradigm: RSC neurons were infected with AAV to express ChR2, and  
559 photostimuli were applied to RSC while recording multi-unit activity in both M2  
560 (orthodromically driven) and RSC (locally driven).

561 (B) Activity recorded on the RSC probe during RSC stimulation in animals injected with AAV9-  
562 ChR2. Red trace is the median response across 6 animals (traces for each animal shown in gray).

563 (C) Activity recorded on the M2 probe during the same experiment. Blue trace is the median  
564 response across animals.

565 (D) Overall activity on the RSC and M2 probes plotted together (peak-normalized).

566 (E) Amplitudes of responses (summed events) recorded on the RSC and M2 probes, plotted for  
567 each experiment (gray) and as the median across animals (blue). P-value calculated by 2-sided,  
568 paired sign test.

569 (F) Latencies (to peak) for responses recorded on the RSC and M2 probes. P-value calculated by  
570 2-sided, paired sign test.

571 (G-K) Same, but for experiments using AAV1-ChR2.

572

573 **Figure 4. Parametric characterization of orthodromic (forward) driving.**

574 (A) Light pulses with a total of 25 different combinations of stimulus intensities (20, 40, 60, 80,  
575 and 100% relative to maximum) and durations (1, 5, 10, 20, and 50 ms) were used to  
576 photostimulate the RSC.

577 (B) Activity recorded locally in RSC (red) in response to RSC photostimulation using the stimuli  
578 shown in panel A. Each trace is the median response across AAV9-ChR2 animals ( $n = 6$   
579 experiments).

580 (C) Activity recorded simultaneously in M2 (green) in the same experiments.

581

582 **Figure 4—figure supplement 1. Parametric characterization of orthodromic (forward)**

583 **driving: AAV1 data.**

584 (A) Light pulses with a total of 25 different combinations of stimulus intensities (20, 40, 60, 80,  
585 and 100% relative to maximum) and durations (1, 5, 10, 20, and 50 ms) were used to  
586 photostimulate the RSC.

587 (B) Activity recorded locally in RSC (red) in response to RSC photostimulation using the stimuli  
588 shown in panel A. Each trace is the median response across AAV1-ChR2 animals ( $n = 6$   
589 experiments).

590 (C) Activity recorded simultaneously in M2 (green) in the same experiments.

591

592 **Figure 5. A simple two-stage model captures the major features of orthodromic driving.**

593 (A) Depiction of the modeling. The first stage is the conversion of light pulses into local activity  
594 in the RSC, which is modeled by convolving the step pulses of light with a step function scaled  
595 by a decay process. The second stage is the conversion of the upstream RSC activity into  
596 downstream M2 activity, which is modeled by convolving the RSC activity with an exponential  
597 process with a temporal lag. The models were fitted to the data over the 0-60 ms poststimulus  
598 interval. See text for additional details.

599 (B) The fitted RSC responses (red) were generated by modeling the light pulse→RSC transfer  
600 function as described in panel A. The AAV9 data traces (gray) are shown superimposed.

601 (C) Plot of the residuals (black trace), calculated by subtracting the mean fitted traces (red) from  
602 the mean data traces (gray).

603 (D) The fitted M2 responses (green) were generated by modeling the RSC→M2 transfer function  
604 as described in panel A. The data traces (gray) are shown superimposed.

605 (E) Plot of the residuals (black trace), calculated by subtracting the mean fitted traces (green)  
606 from the mean data traces (gray).

607

608 **Figure 5—figure supplement 1. A simple two-stage model captures the major features of**  
609 **orthodromic driving: AAV1 data.**

610 (A) The fitted RSC responses (red) were generated by modeling the light pulse→RSC transfer  
611 function as described in panel A. The data traces are shown superimposed in gray.

612 (B) Plot of the residuals (black trace), calculated by subtracting the mean fitted traces (red) from  
613 the mean data traces (gray).

614 (C) The fitted M2 responses (green) were generated by modeling the RSC→M2 transfer function  
615 as described in panel A. The data traces are shown superimposed in gray.

616 (D) Plot of the residuals (black trace), calculated by subtracting the mean fitted traces (green)  
617 from the mean data traces (gray).

618

619 **Figure 6. Analysis of orthodromically driven response amplitudes and latencies.**

620 (A) Amplitudes (calculated as the summed events) of the responses recorded on the RSC and M2  
621 probes during RSC photostimulation, for each of the 25 combinations of stimulus intensity and  
622 duration (gray) along with the median values (blue). Experiments with AAV9 are shown on the  
623 left, and those with AAV1 in the middle. P-values calculated by 2-sided, paired sign test.

624 (B) Driving ratios (defined as the ratio of activity generated locally in RSC over that generated  
625 remotely in M2) calculated for AAV9 and AAV1 experiments, plotted as the median (across the  
626 25 stimulus parameter combinations)  $\pm$  m.a.d.

627 (C) Same, but for latencies. Scaling of the vertical axes is set to facilitate comparison to similar  
628 plots in Fig. 8.

629

630 **Figure 6—figure supplement 1. Dependence of RSC responses on stimulus intensity and**  
631 **duration.**

632 (A) Top: For the RSC recordings, response amplitudes are plotted as a function of stimulus  
633 intensity; each line is for data recorded at constant stimulus duration, as indicated. Bottom: Same  
634 analysis, for the modeled responses.

635 (B) Top: Same curves as in panel A, but peak-normalized. Response amplitudes grew  
636 approximately linearly with stimulus intensity. Bottom: Same analysis, for the modeled  
637 responses.

638 (C) Top: Same as panel A, but showing responses as a function of stimulus duration. Bottom:  
639 Same analysis, for the modeled responses.

640 (D) Top: Same curves as in panel D, but peak-normalized. Bottom: Same analysis, for the  
641 modeled responses.

642 Response amplitudes grew sub-linearly (approximately logarithmically) with stimulus duration.  
643 Bottom: Same analysis, for the modeled responses.

644

645 **Figure 6—figure supplement 2. Dependence of M2 responses on stimulus intensity and**  
646 **duration.**

647 (A) Top: For the M2 recordings, response amplitudes are plotted as a function of stimulus  
648 intensity; each line is for data recorded at constant stimulus duration, as indicated. Bottom: Same  
649 analysis, for the modeled responses.

650 (B) Top: Same curves as in panel A, but peak-normalized. Response amplitudes grew  
651 approximately linearly with stimulus intensity. Bottom: Same analysis, for the modeled  
652 responses.

653 (C) Top: Same as panel A, but showing responses as a function of stimulus duration. Bottom:  
654 Same analysis, for the modeled responses.

655 (D) Top: Same curves as in panel D, but peak-normalized. Bottom: Same analysis, for the  
656 modeled responses. Response amplitudes grew sub-linearly (approximately logarithmically) with  
657 stimulus duration. Bottom: Same analysis, for the modeled responses.

658

659 **Figure 7. Driving in reverse: antidromic propagation.**

660 (A) Experimental paradigm: RSC neurons were infected with AAV to express ChR2, and  
661 photostimuli were applied to M2 (to stimulate axons of RSC neurons) while recording multi-unit  
662 activity in both M2 (locally driven) and RSC (antidromically driven).

663 (B) Activity recorded on the RSC probe during RSC stimulation in an animal injected with  
664 AAV9-ChR2. Red trace is the median response across animals (traces for each animal shown in  
665 gray).

666 (C) Activity recorded on the M2 probe during the same experiment. Blue trace is the median  
667 response across animals.

668 (D) Overall activity on the RSC and M2 probes plotted together (peak-normalized).

669 (E) Amplitudes of responses (summed events) recorded on the RSC and M2 probes, plotted for  
670 each experiment (gray) and as the median across animals (blue). P-value calculated by 2-sided,  
671 paired sign test.

672 (F) Latencies (to peak) for responses recorded on the RSC and M2 probes.

673 (G-K) Same, but for experiments using AAV1-ChR2.

674 (L) Response amplitudes across all 25 stimulus parameter combinations (gray), with the overall  
675 median (blue), for AAV9 (left) and AAV1 (middle) experiments. Right: Driving ratios (defined  
676 as the ratio of activity generated locally in RSC over that generated remotely in M2) calculated  
677 for AAV9 and AAV1 experiments, plotted as the median (across the 25 stimulus parameter

678 combinations)  $\pm$  m.a.d. Scaling of the vertical axes is set to facilitate comparison to similar plots  
679 in Fig. 6.

680 (M) Same, for latencies.

681

## 682 **Figure 8. Laminar analysis.**

683 (A) Left: Image of 32-channel silicon probe, taken through the ocular of a stereoscope, showing  
684 5 visible contacts above the penetration site into the cortex. Distance between contacts is 50  $\mu$ m.

685 Right: Plot of the variance in the FFT of the traces collected on the first 20 channels of the probe,  
686 showing an abrupt increase for channels deeper than the 6<sup>th</sup> contact (dashed line).

687 (B) Average peristimulus-time histogram across all channels in a 32-channel array in M2 during  
688 RSC photostimulation, plotted on a color scale.

689 (C) Laminar profiles recorded for each animal (left) and overall profile (mean  $\pm$  s.e.m.,  $n = 9$   
690 mice injected with AAV1-ChR2) as calculated for the response interval (red) and baseline (blue).

691 (D) In *ex vivo* brain slice experiments, cell-attached recordings were made from layer 2/3 and  
692 layer 5B neurons while photostimulating RSC axons. Left: Example traces showing spiking  
693 response in the layer 5B neuron. Right: The mean number of evoked spikes was calculated for  
694 each neuron, and plotted as a cumulative histogram of spike probability. Layer 5B neurons  
695 spiked significantly more than layer 2/3 neurons ( $p = 0.009$ , rank-sum test; median spikes were 0  
696 vs 1 for layer 2/3 vs 5B, respectively;  $n = 15$  layer 2/3 and 15 layer 5B neurons).

697

698

699 **REFERENCES**

700

- 701 Arbib MA (2002) *The Handbook of Brain Theory and Neural Networks*, 2 Edition. Cambridge,  
702 Massachusetts: MIT Press.
- 703 Bassett DS, Sporns O (2017) Network neuroscience. *Nat Neurosci* 20:353-364.  
704 doi:10.1038/nn.4502
- 705 Bernander O, Koch C, Douglas RJ (1994) Amplification and linearization of distal synaptic input  
706 to cortical pyramidal cells. *J Neurophysiol* 72:2743-2753.
- 707 Brown CE, Aminoltejari K, Erb H, Winship IR, Murphy TH (2009) In vivo voltage-sensitive dye  
708 imaging in adult mice reveals that somatosensory maps lost to stroke are replaced over  
709 weeks by new structural and functional circuits with prolonged modes of activation  
710 within both the peri-infarct zone and distant sites. *J Neurosci* 29:1719-1734.  
711 doi:10.1523/JNEUROSCI.4249-08.2009
- 712 Carandini M (2012) From circuits to behavior: a bridge too far? *Nat Neurosci* 15:507-509.  
713 doi:10.1038/nn.3043
- 714 Carandini M, Heeger DJ, Movshon JA (1997) Linearity and normalization in simple cells of the  
715 macaque primary visual cortex. *J Neurosci* 17:8621-8644.
- 716 Chapman B, Zahs KR, Stryker MP (1991) Relation of cortical cell orientation selectivity to  
717 alignment of receptive fields of the geniculocortical afferents that arborize within a single  
718 orientation column in ferret visual cortex. *J Neurosci* 11:1347-1358.
- 719 Chatterjee S, Callaway EM (2003) Parallel colour-opponent pathways to primary visual cortex.  
720 *Nature* 426:668-671. doi:10.1038/nature02167
- 721 Ermentrout GB, Terman DH (2010) *Mathematical Foundations of Neuroscience*. New York:  
722 Springer Verlag.
- 723 Felleman DJ, Van Essen DC (1991) Distributed hierarchical processing in the primate cerebral  
724 cortex. *Cereb Cortex* 1:1-47.
- 725 Glasser MF, Coalson TS, Robinson EC, Hacker CD, Harwell J, Yacoub E, Ugurbil K, Andersson  
726 J, Beckmann CF, Jenkinson M, Smith SM, Van Essen DC (2016) A multi-modal  
727 parcellation of human cerebral cortex. *Nature* 536:171-178. doi:10.1038/nature18933
- 728 Grosenick L, Marshel JH, Deisseroth K (2015) Closed-loop and activity-guided optogenetic  
729 control. *Neuron* 86:106-139. doi:10.1016/j.neuron.2015.03.034
- 730 Harris KD, Shepherd GM (2015) The neocortical circuit: themes and variations. *Nat Neurosci*  
731 18:170-181. doi:10.1038/nn.3917
- 732 Histed MH, Bonin V, Reid RC (2009) Direct activation of sparse, distributed populations of  
733 cortical neurons by electrical microstimulation. *Neuron* 63:508-522.  
734 doi:10.1016/j.neuron.2009.07.016
- 735 Hooks BM, Mao T, Gutnisky D, Yamawaki N, Svoboda K, Shepherd GMG (2013) Organization  
736 of cortical and thalamic input to pyramidal neurons in mouse motor cortex. *J Neurosci*  
737 33:748-760. doi:10.1523/JNEUROSCI.4338-12.2013
- 738 Jbabdi S, Sotiropoulos SN, Haber SN, Van Essen DC, Behrens TE (2015) Measuring  
739 macroscopic brain connections in vivo. *Nat Neurosci* 18:1546-1555. doi:10.1038/nn.4134
- 740 Kinnischtzke AK, Simons DJ, Fanselow EE (2014) Motor cortex broadly engages excitatory and  
741 inhibitory neurons in somatosensory barrel cortex. *Cereb Cortex* 24:2237-2248.  
742 doi:10.1093/cercor/bht085



- 743 Kinnischtzke AK, Fanselow EE, Simons DJ (2016) Target-specific M1 inputs to infragranular S1  
744 pyramidal neurons. *J Neurophysiol* 116:1261-1274. doi:10.1152/jn.01032.2015
- 745 La Camera G, Rauch A, Thurbon D, Luscher HR, Senn W, Fusi S (2006) Multiple time scales of  
746 temporal response in pyramidal and fast spiking cortical neurons. *J Neurophysiol*  
747 96:3448-3464. doi:10.1152/jn.00453.2006
- 748 Lim DH, Mohajerani MH, Ledue J, Boyd J, Chen S, Murphy TH (2012) In vivo large-scale  
749 cortical mapping using channelrhodopsin-2 stimulation in transgenic mice reveals  
750 asymmetric and reciprocal relationships between cortical areas. *Front Neural Circuits*  
751 6:11. doi:10.3389/fncir.2012.00011
- 752 Lin JY, Lin MZ, Steinbach P, Tsien RY (2009) Characterization of engineered channelrhodopsin  
753 variants with improved properties and kinetics. *Biophys J* 96:1803-1814.  
754 doi:10.1016/j.bpj.2008.11.034
- 755 Maguire EA (2001) The retrosplenial contribution to human navigation: a review of lesion and  
756 neuroimaging findings. *Scandinavian journal of psychology* 42:225-238.
- 757 Manita S, Suzuki T, Homma C, Matsumoto T, Odagawa M, Yamada K, Ota K, Matsubara C,  
758 Inutsuka A, Sato M, Ohkura M, Yamanaka A, Yanagawa Y, Nakai J, Hayashi Y, Larkum  
759 ME, Murayama M (2015) A Top-Down Cortical Circuit for Accurate Sensory  
760 Perception. *Neuron* 86:1304-1316. doi:10.1016/j.neuron.2015.05.006
- 761 Mao T, Kusefoglou D, Hooks BM, Huber D, Petreanu L, Svoboda K (2011) Long-range neuronal  
762 circuits underlying the interaction between sensory and motor cortex. *Neuron* 72:111-  
763 123. doi:10.1016/j.neuron.2011.07.029
- 764 Miesenbock G (2009) The optogenetic catechism. *Science* 326:395-399.  
765 doi:10.1126/science.1174520
- 766 Miller KD (2016) Canonical computations of cerebral cortex. *Curr Opin Neurobiol* 37:75-84.  
767 doi:10.1016/j.conb.2016.01.008
- 768 Minoshima S, Giordani B, Berent S, Frey KA, Foster NL, Kuhl DE (1997) Metabolic reduction  
769 in the posterior cingulate cortex in very early Alzheimer's disease. *Ann Neurol* 42:85-94.  
770 doi:10.1002/ana.410420114
- 771 Masic B, Sporns O (2016) From regions to connections and networks: new bridges between brain  
772 and behavior. *Curr Opin Neurobiol* 40:1-7. doi:10.1016/j.conb.2016.05.003
- 773 Nagel G, Brauner M, Liewald JF, Adeishvili N, Bamberg E, Gottschalk A (2005) Light  
774 activation of channelrhodopsin-2 in excitable cells of *Caenorhabditis elegans* triggers  
775 rapid behavioral responses. *Curr Biol* 15:2279-2284. doi:10.1016/j.cub.2005.11.032
- 776 Nagel G, Szellas T, Huhn W, Kateriya S, Adeishvili N, Berthold P, Ollig D, Hegemann P,  
777 Bamberg E (2003) Channelrhodopsin-2, a directly light-gated cation-selective membrane  
778 channel. *Proc Natl Acad Sci U S A* 100:13940-13945. doi:10.1073/pnas.1936192100
- 779 Nowak LG, Bullier J (1998) Axons, but not cell bodies, are activated by electrical stimulation in  
780 cortical gray matter. II. Evidence from selective inactivation of cell bodies and axon  
781 initial segments. *Exp Brain Res* 118:489-500.
- 782 Oh SW et al. (2014) A mesoscale connectome of the mouse brain. *Nature* 508:207-214.  
783 doi:10.1038/nature13186
- 784 Petreanu L, Huber D, Sobczyk A, Svoboda K (2007) Channelrhodopsin-2-assisted circuit  
785 mapping of long-range callosal projections. *Nat Neurosci* 10:663-668.  
786 doi:10.1038/nn1891
- 787 Petreanu L, Mao T, Sternson SM, Svoboda K (2009) The subcellular organization of neocortical  
788 excitatory connections. *Nature* 457:1142-1145. doi:10.1038/nature07709

- 789 Petrof I, Viaene AN, Sherman SM (2015) Properties of the primary somatosensory cortex  
790 projection to the primary motor cortex in the mouse. *J Neurophysiol* 113:2400-2407.  
791 doi:10.1152/jn.00949.2014
- 792 Raastad M, Shepherd GM (2003) Single-axon action potentials in the rat hippocampal cortex. *J*  
793 *Physiol* 548:745-752. doi:10.1113/jphysiol.2002.032706
- 794 Rolls ET (2016) *Cerebral Cortex: Principles of Operation*. Oxford: Oxford University Press.
- 795 Sabatini BL, Regehr WG (1999) Timing of synaptic transmission. *Annu Rev Physiol* 61:521-  
796 542. doi:10.1146/annurev.physiol.61.1.521
- 797 Sato TK, Hausser M, Carandini M (2014) Distal connectivity causes summation and division  
798 across mouse visual cortex. *Nat Neurosci* 17:30-32. doi:10.1038/nn.3585
- 799 Sherman SM, Guillery RW (2011) Distinct functions for direct and transthalamic corticocortical  
800 connections. *J Neurophysiol* 106:1068-1077. doi:10.1152/jn.00429.2011
- 801 Sreenivasan V, Esmaeili V, Kiritani T, Galan K, Crochet S, Petersen CC (2016) Movement  
802 Initiation Signals in Mouse Whisker Motor Cortex. *Neuron* 92:1368-1382.  
803 doi:10.1016/j.neuron.2016.12.001
- 804 Sugar J, Witter MP, van Strien NM, Cappaert NL (2011) The retrosplenial cortex: intrinsic  
805 connectivity and connections with the (para)hippocampal region in the rat. An interactive  
806 connectome. *Front Neuroinform* 5:7. doi:10.3389/fninf.2011.00007
- 807 Suter BA, Shepherd GMG (2015) Reciprocal interareal connections to corticospinal neurons in  
808 mouse m1 and s2. *J Neurosci* 35:2959-2974. doi:10.1523/JNEUROSCI.4287-14.2015
- 809 Suter BA, Migliore M, Shepherd GMG (2013) Intrinsic electrophysiology of mouse  
810 corticospinal neurons: a class-specific triad of spike-related properties. *Cerebral Cortex*  
811 23:1965-1977. doi:10.1093/cercor/bhs184
- 812 Vann SD, Aggleton JP, Maguire EA (2009) What does the retrosplenial cortex do? *Nat Rev*  
813 *Neurosci* 10:792-802. doi:10.1038/nrn2733
- 814 Wark B, Lundstrom BN, Fairhall A (2007) Sensory adaptation. *Curr Opin Neurobiol* 17:423-  
815 429. doi:10.1016/j.conb.2007.07.001
- 816 Yamawaki N, Shepherd GMG (2015) Synaptic circuit organization of motor corticothalamic  
817 neurons. *J Neurosci* 35:2293-2307. doi:10.1523/JNEUROSCI.4023-14.2015
- 818 Yamawaki N, Radulovic J, Shepherd GM (2016) A corticocortical circuit directly links  
819 retrosplenial cortex to M2 in the mouse. *J Neurosci* 36:9365-9374.  
820 doi:10.1523/JNEUROSCI.1099-16.2016
- 821 Yang W, Carrasquillo Y, Hooks BM, Nerbonne JM, Burkhalter A (2013) Distinct balance of  
822 excitation and inhibition in an interareal feedforward and feedback circuit of mouse  
823 visual cortex. *J Neurosci* 33:17373-17384. doi:10.1523/JNEUROSCI.2515-13.2013
- 824 Zingg B, Hintiryan H, Gou L, Song MY, Bay M, Bienkowski MS, Foster NN, Yamashita S,  
825 Bowman I, Toga AW, Dong HW (2014) Neural networks of the mouse neocortex. *Cell*  
826 156:1096-1111. doi:10.1016/j.cell.2014.02.023  
827  
828

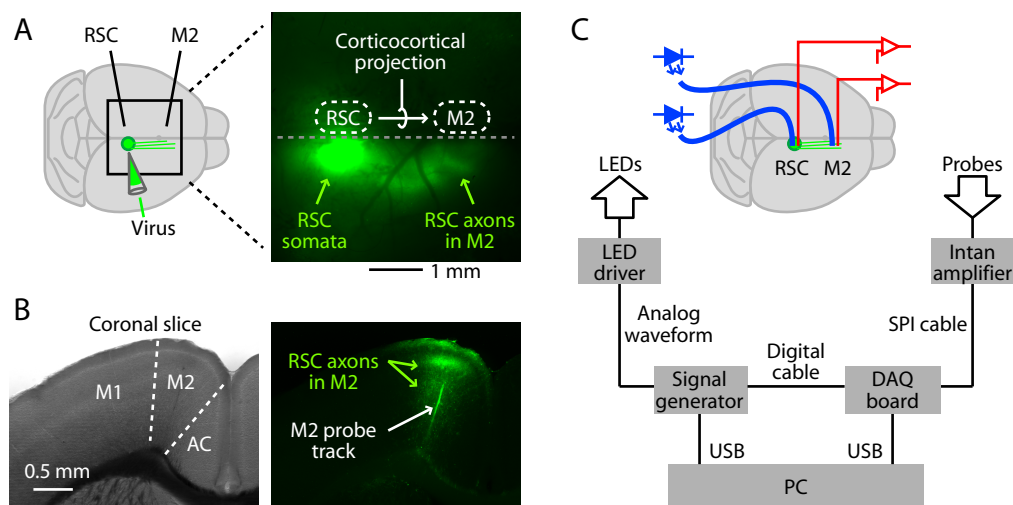

Figure 1

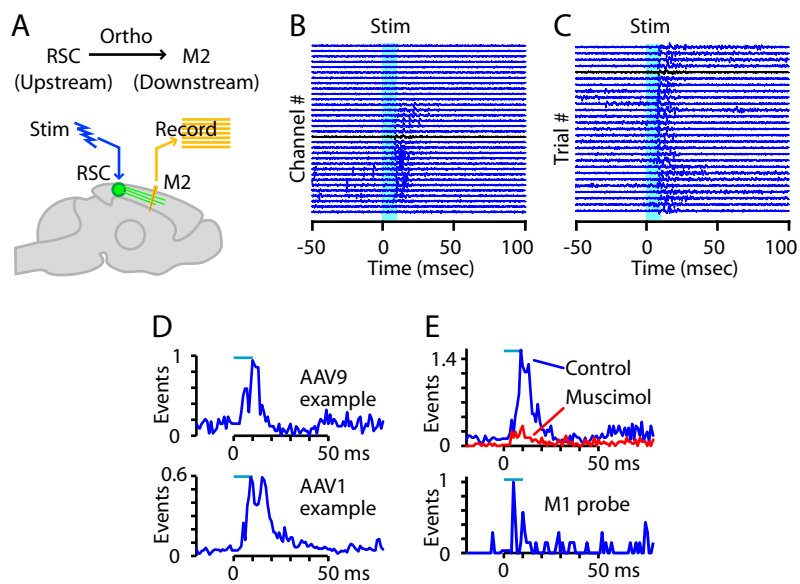

Figure 2

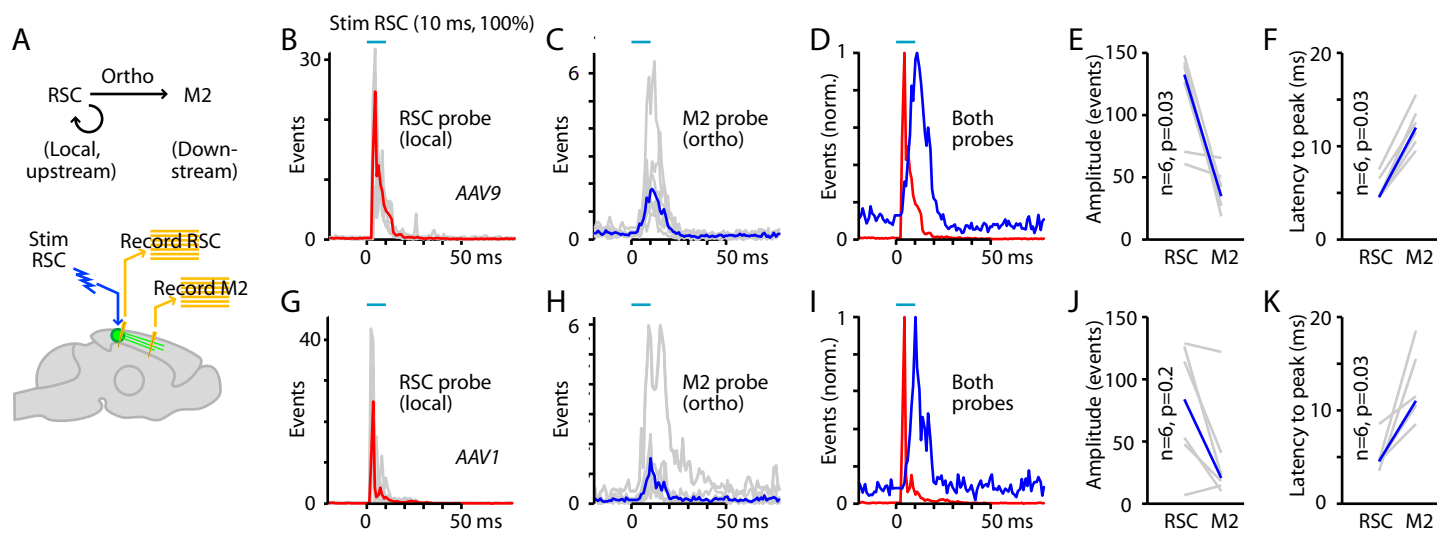

Figure 3

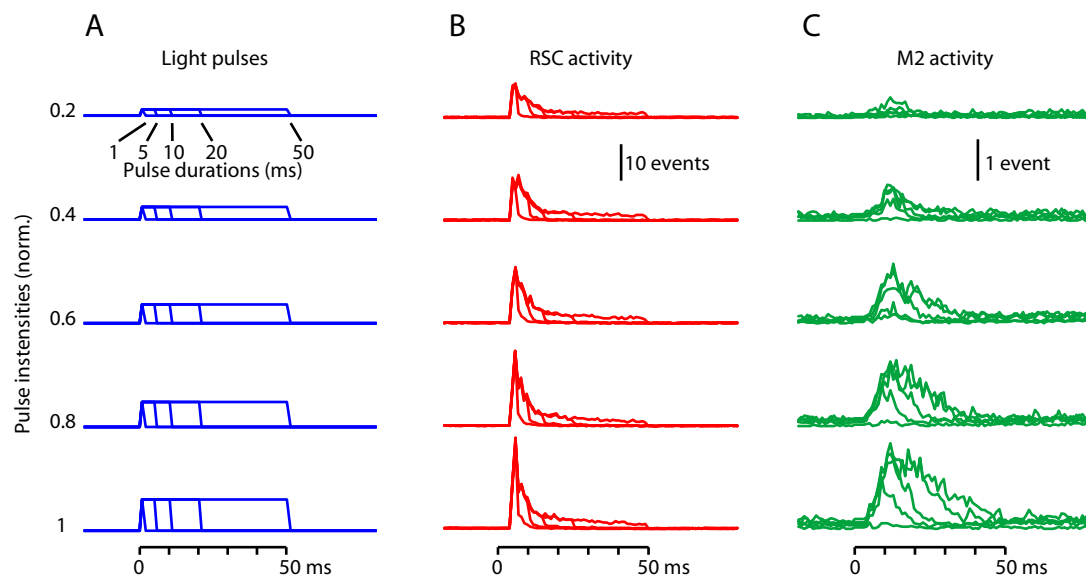

Figure 4

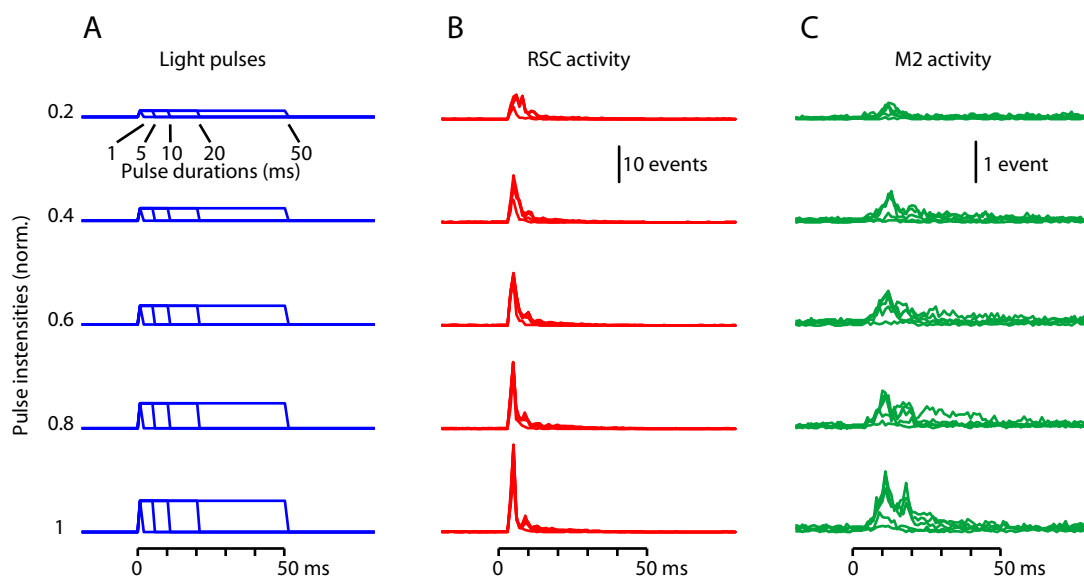

Figure 4--figure supplement 1

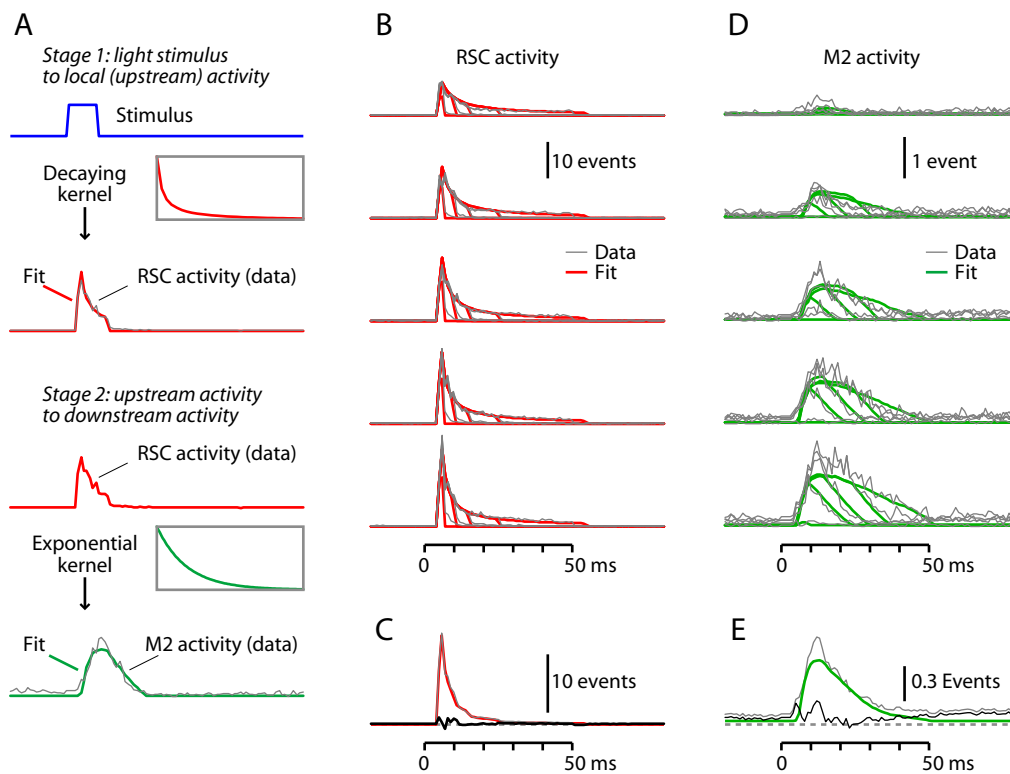

Figure 5



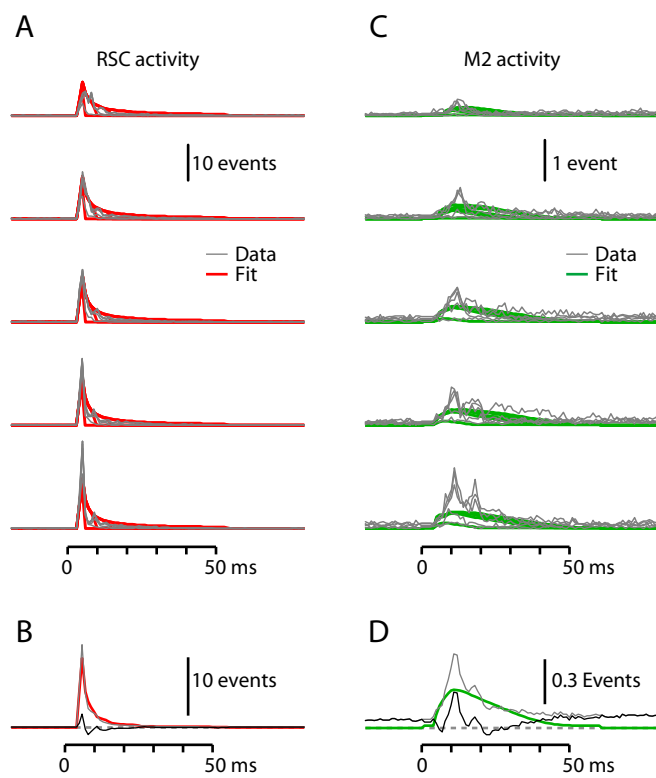

Figure 5--figure supplement 1

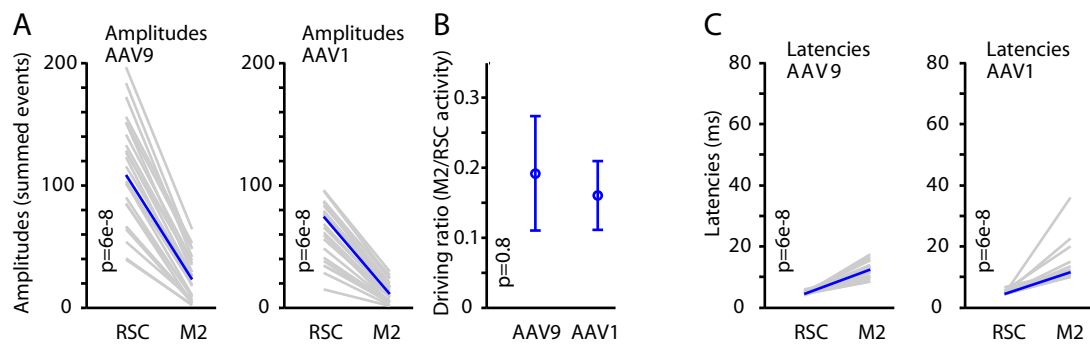

Figure 6

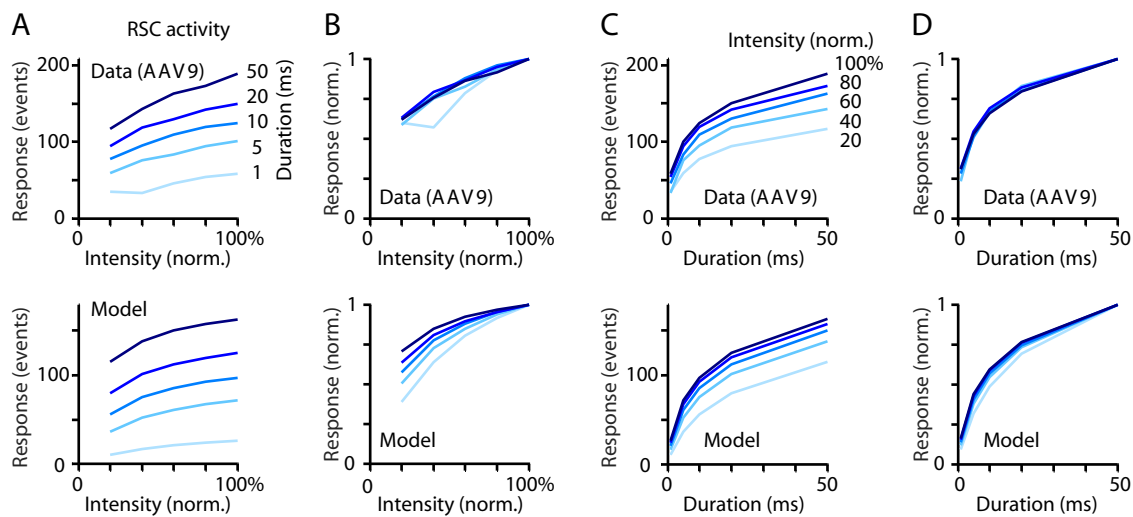

Figure 6---figure supplement 1

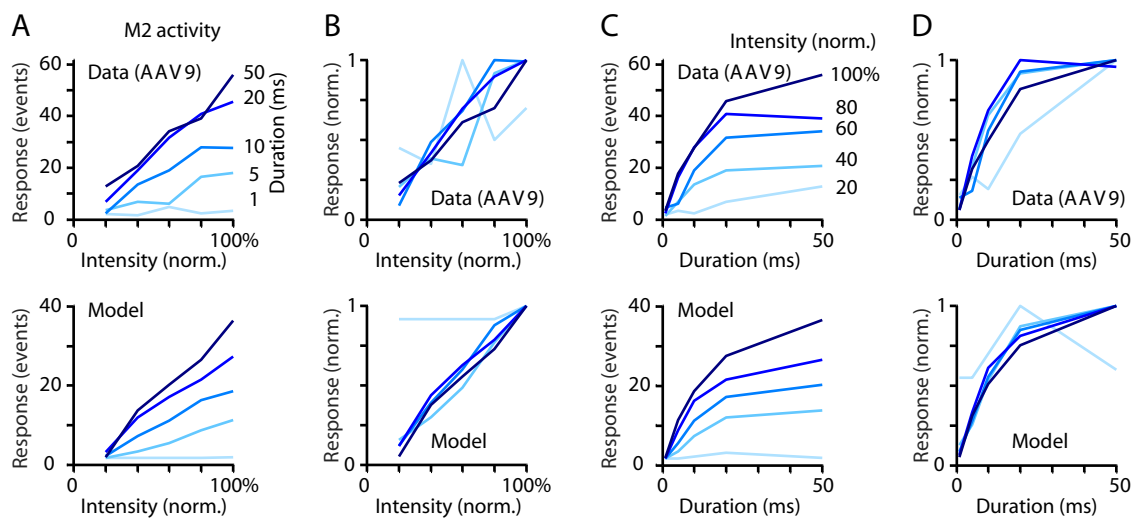

Figure 6---figure supplement 2

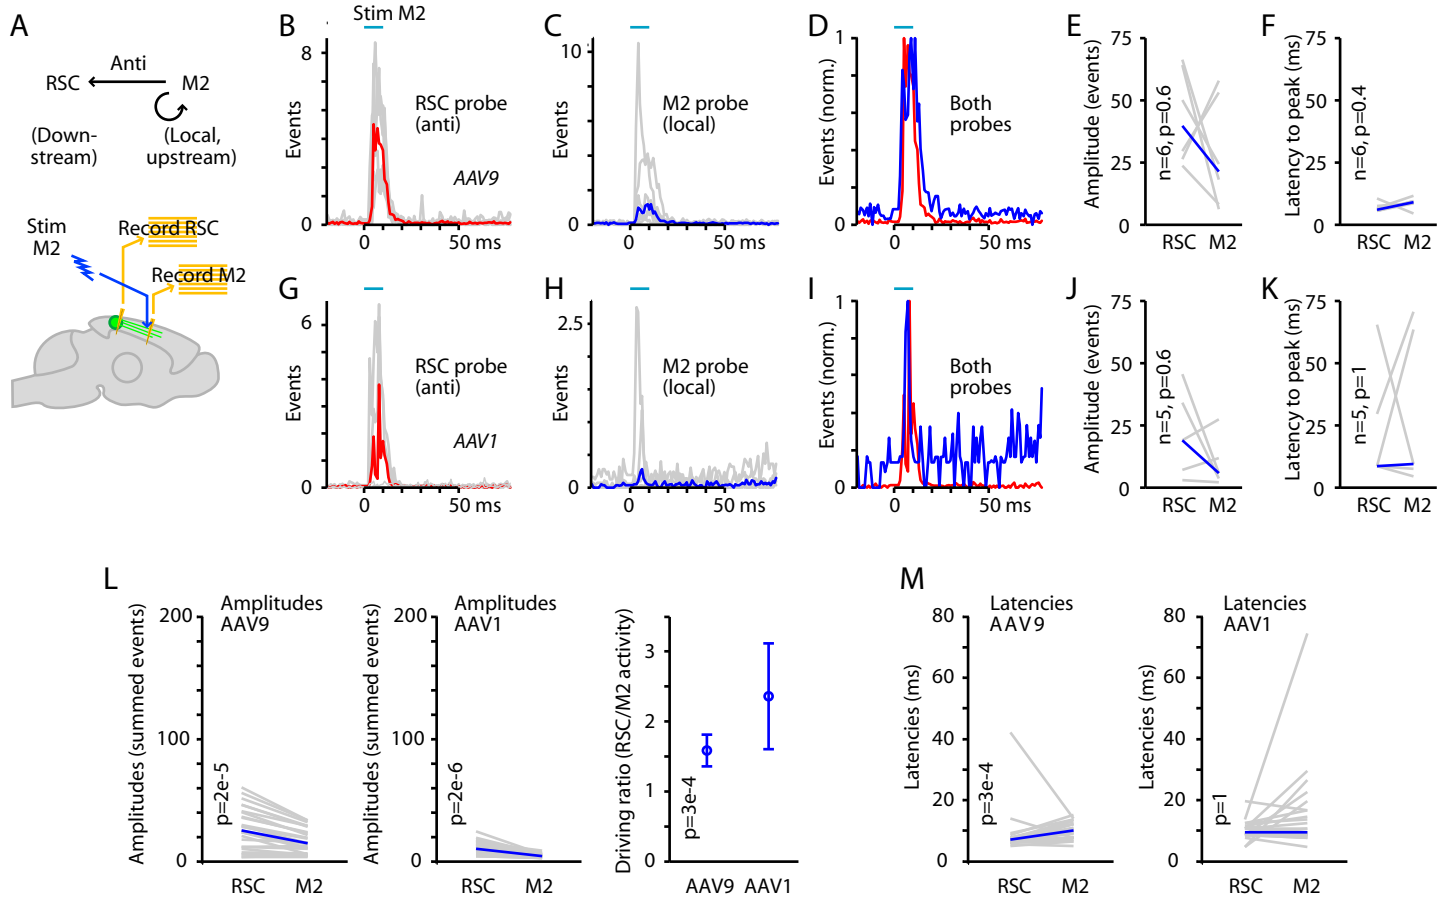

Figure 7

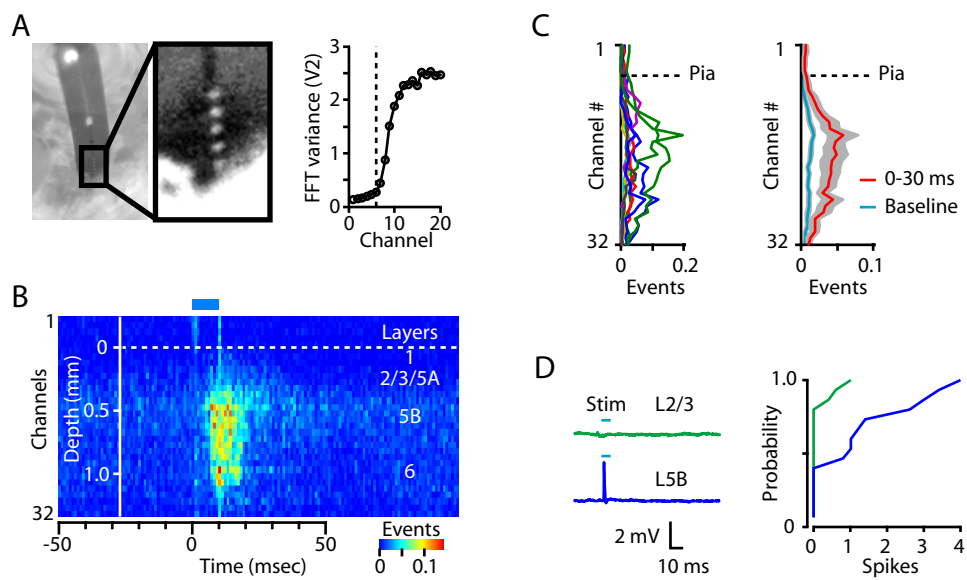

Figure 8
